# Supplementary material
Source: PubMed Central journal article supplement (PMC1304474)
Supplement: biophysj_87_2_1360__1.pdf [file biophysj_87_2_1360__1.pdf]

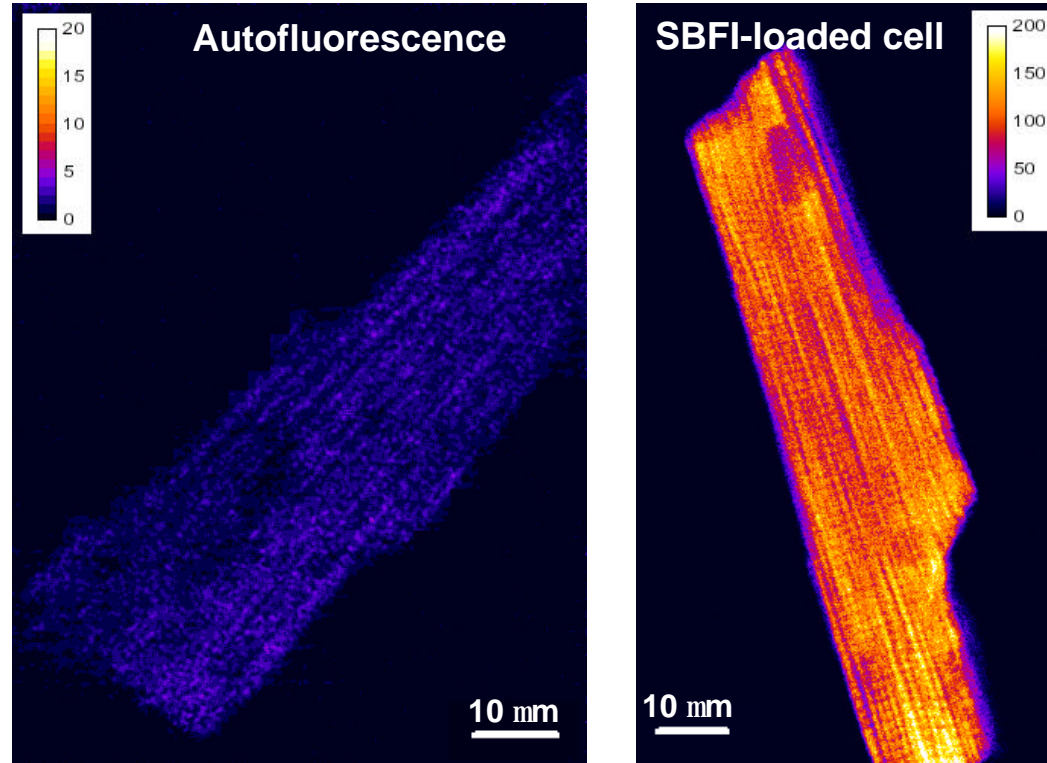

**Figure S1.** Two-photon excitation images of an unloaded (autofluorescence) and an SBFI-loaded rat ventricular myocyte. Note the difference in the color-coded scales. Images were taken under identical laser intensity and signal amplification conditions. Excitation=760 nm, emission=528±25 nm.
