# Supplementary material
Source: PubMed Central journal article supplement (PMC1304474)
Supplement: biophysj_87_2_1360__2.pdf [file biophysj_87_2_1360__2.pdf]

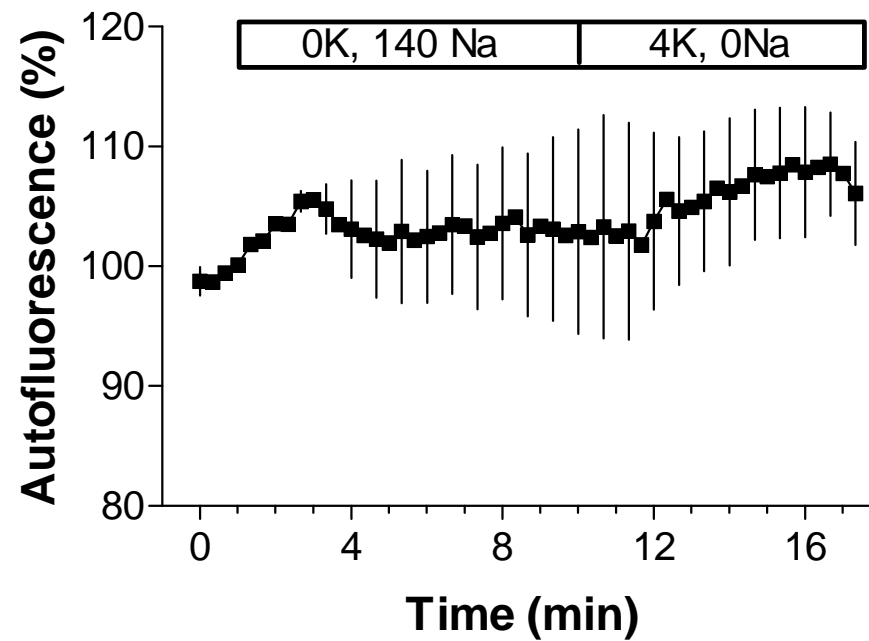

**Figure S2.** Changes in the autofluorescence of the cells upon Na/K pump inhibition (external K-free conditions) and re-activation (0Na, 4K). Data represent the mean $\pm$ SEM of 3 separate experiments and are expressed as percentage changes from the signal measured in normal Tyrode's solution. For these experiments, the laser intensity and the gain were 10x and 5x higher than in all other measurements, respectively.
