# Supplementary material
Source: PubMed Central journal article supplement (PMC1304474)
Supplement: biophysj_87_2_1360__3.pdf [file biophysj_87_2_1360__3.pdf]

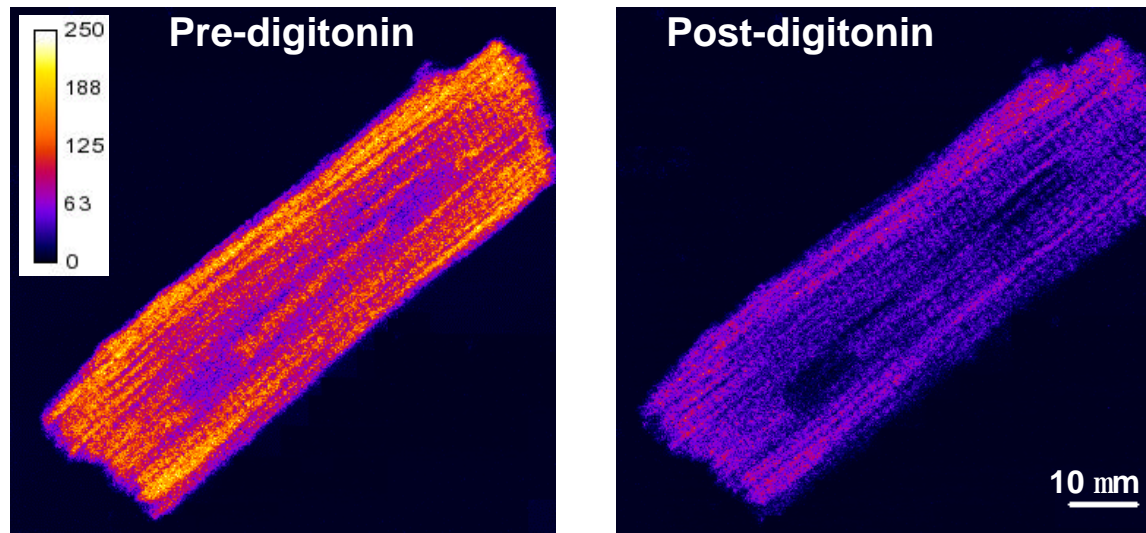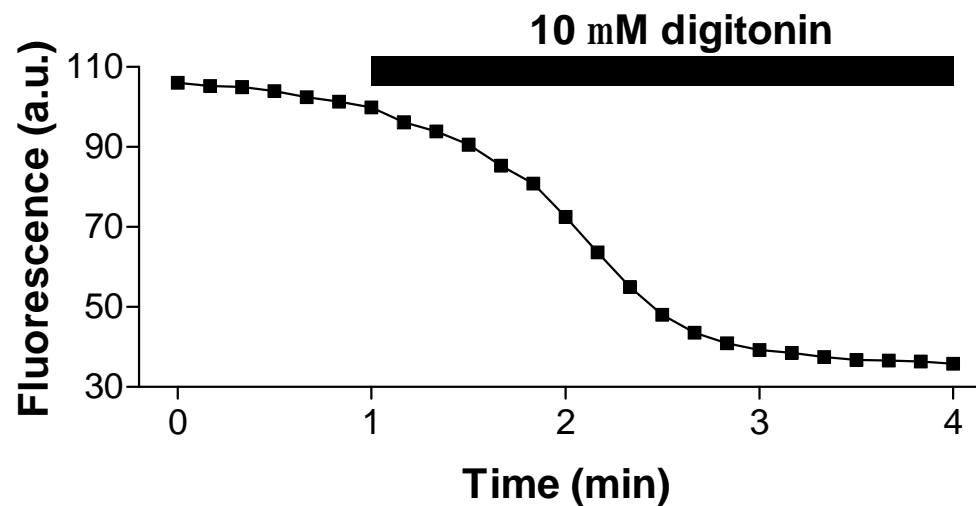

**Figure S3.** The fluorescence originating from cytosolic SBF1 represents 64% of the total signal. Myocytes were first depleted of Na by incubating for >10 min in 0Na, 4 K solution. Then the sarcolemma was permeabilized to release the cytosolic dye. The remaining signal comes from the dye compartmentalized into internal organelles, most likely the mitochondria. The permeabilization was done in an “internal” solution containing (in mM): 30 KCl, 100 K-aspartate, 0.7 MgCl<sub>2</sub>, 5 Mg-ATP, 5 di-Tris-phosphocreatine, 0.5 EGTA, 10 glutathione, 10 HEPES, 10 glucose.
